# Supplementary material for: Detection and Quantification of Ammonia as the Ammonium Cation in Human Saliva by 1H NMR: A Promising Probe for Health Status Monitoring, with Special Reference to Cancer
Source: MDPI journal article supplement (doi:10.3390/metabo13070792), 2023-06-26
Supplement: s1 [file s1]

## Supplementary Materials

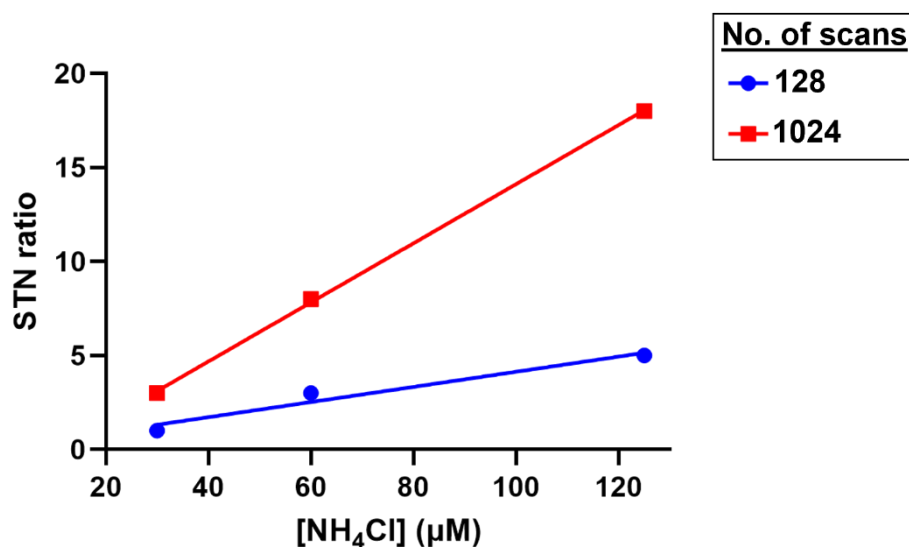

**Figure S1. Plots of STN ratio against  $\text{NH}_4^+$  ion concentration.** These plots show dependence of the STN ratio on low levels of  $\text{NH}_4^+$  ion concentration (added as ammonium chloride,  $\text{NH}_4\text{Cl}$ ) using either 128 (blue) or 1,024 (red)  $^1\text{H}$  NMR scans at an operating frequency of 600 MHz ( $\mu\text{M} = \mu\text{mol./L}$ ). Spectra were acquired according to the description in Section 2.3 using the ROBUST-5 pulse sequence.

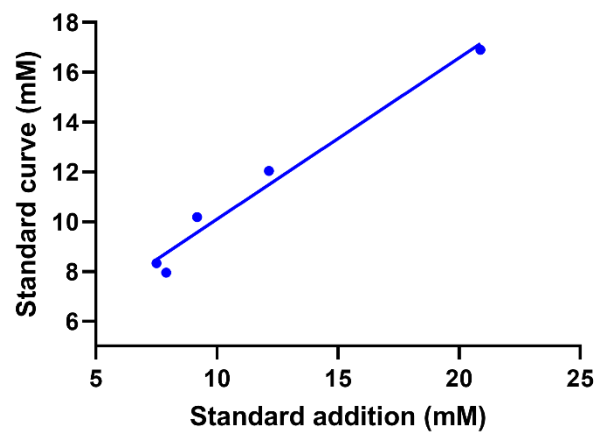

**Figure S2. Comparison of the standard calibration curve and standard addition methods.** Plot of WMSS  $\text{NH}_4^+$  concentrations (mM = mmol./L) estimated from the standard calibration curve and standard addition method (SAM) bioanalytical strategies. This plot displays a strong linear relationship between the two different methods deployed for the analysis of  $n = 5$  WMSS evaluation samples.

| Sample Code | Salivary [NH <sub>4</sub> <sup>+</sup> ] (mmol./L) |
|-------------|----------------------------------------------------|
| 1           | 16.90                                              |
| 2           | 6.76                                               |
| 3           | 8.33                                               |
| 4           | 6.00                                               |
| 5           | 7.96                                               |
| 6           | 2.99                                               |
| 7           | 14.79                                              |
| 8           | 14.15                                              |
| 9           | 11.66                                              |
| 10          | 18.52                                              |
| 11          | 15.22                                              |
| 12          | 13.93                                              |
| 13          | 14.17                                              |
| 14          | 15.89                                              |
| 15          | 17.62                                              |
| 16          | 4.48                                               |
| 17          | 13.44                                              |
| 18          | 13.39                                              |
| 19          | 14.19                                              |
| 20          | 10.18                                              |
| 21          | 11.56                                              |
| 22          | 10.63                                              |
| 23          | 6.50                                               |
| 24          | 16.57                                              |
| 25          | 12.04                                              |
| 26          | 6.74                                               |
| 27          | 3.01                                               |

**Table S1. Standard calibration curve-determined NH<sub>4</sub><sup>+</sup> ion concentrations (mmol./L) in n = 27 WMSS samples collected during this study.**
